# Supplementary material for: Dysregulated activation of fetal liver programme in acute liver failure
Source: PubMed Central journal article supplement — Gut. 2019 Jan 22;68(6):1076–87. doi: 10.1136/gutjnl-2018-317603 (PMC6580749; doi:10.1136/gutjnl-2018-317603), 2019-01-22
Supplement: gutjnl-2018-317603supp002.pdf [file gutjnl-2018-317603supp002.pdf]

**Supplemental table 1. Clinical information of patients with acute liver failure**

| # | Age | Gender | Race      | Ethnicity    | Etiology             | Diagnosis                                        | Total bilirubin (mg/dL) | ALP (IU/L) | ALT (IU/L) | AST (IU/L) |
|---|-----|--------|-----------|--------------|----------------------|--------------------------------------------------|-------------------------|------------|------------|------------|
| 1 | 33  | F      | Black     | Not hispanic | Autoimmune hepatitis | Submassive liver necrosis, FHF                   | 30                      | N/A        | N/A        | 3000       |
| 2 | 30  | F      | Caucasian | Not hispanic | DILI (doxycycline)   | Severe interface and lobular hepatitis, FHF      | 14.2                    | 133        | 844        | 2239       |
| 3 | 40  | F      | Caucasian | Not hispanic | DILI (simvastatin)   | Massive hepatic necrosis                         | 20                      | 174        | 807        | 430        |
| 4 | 34  | F      | Caucasian | Not hispanic | DILI                 | Massive hepatic necrosis with early regeneration | 25.7                    | 165        | 3651       | 2679       |
| 5 | 40  | M      | Caucasian | Not hispanic | Acute HBV            | Massive hepatic necrosis                         | 29                      | 121        | 972        | 710        |
| 6 | 28  | M      | Caucasian | Not hispanic | DILI                 | Acute cholestatic liver injury                   | 88.8                    | 198        | 124        | 62         |
| 7 | 29  | F      | Black     | Not hispanic | Unknown              | FHF                                              | 11.3                    | N/A        | N/A        | N/A        |
| 8 | 40  | F      | Caucasian | Not hispanic | DILI (APAP)          | Massive cell death, Proliferating bile ductules  | 2.7                     | 167        | 171        | 917        |

DILI, drug-induced liver injury; APAP, acetyl-para-aminophenol; FHF, fulminant hepatic failure; HBV, hepatitis B infection; ALP, alkaline phosphatase; ALT, alanine transaminase; AST, aspartate transaminase
