# Supplementary material for: Dysregulated activation of fetal liver programme in acute liver failure
Source: PubMed Central journal article supplement — Gut. 2019 Jan 22;68(6):1076–87. doi: 10.1136/gutjnl-2018-317603 (PMC6580749; doi:10.1136/gutjnl-2018-317603), 2019-01-22
Supplement: gutjnl-2018-317603supp003.pdf [file gutjnl-2018-317603supp003.pdf]

**Supplemental table 2. Primer sequences used for qRT-PCR in this study**

| Species         | Gene name            | Forward (5' to 3')        | Reverse (5' to 3')                 |
|-----------------|----------------------|---------------------------|------------------------------------|
| mouse           | Igf2bp3              | GGGAGGTGCTGGATAGTTTAC     | CTAGCTTGGTCCTTACTGGAATAG           |
|                 | Fn14                 | GTGTTGGGATTCGGCTTGGT      | CCAGGCAGAAGTCGCTGTG                |
|                 | Afp                  | CCGAGGAGGAAGTGAACAAA      | GGCTTTCTAAACACCCATCG               |
|                 | CD133                | AGGAGATTGCCCTCTATGAGATCGG | GCAGCCCACCAGAGGCATGC               |
|                 | Sox9                 | CGGCTCCAGCAAGAACAAG       | GCGCCCACAGGATGAAG                  |
|                 | C/ebpa               | CCAGCGACCCGAAACCAT        | GGAACAGCTGAGCCGTGAAC               |
|                 | Cyclin D1            | TAGGCCCTCAGCCTCACTC       | CCACCCCTGGGATAAAGCAC               |
|                 | Cyclin E1            | CAGAGCAGCGAGCAGGAGC       | GCAGCTGCTTCCACACCACT               |
|                 | Cyclin B1            | CAGAGTTCTCAACTTCAGCCTG    | TTGTGAGGCCACAGTTCACCAT             |
|                 | Esrp2                | TATAAAGCCACAGGGGAGGA      | TCTTCCCGTGATAGGAAACG               |
|                 | Tert                 | ATCTGCAGGATTCAGATGCC      | GCAGGAAGTGCAGGAAGAAG               |
| Rps9            | GGGCCTGAAGATTGAGGATT | CGGGCATGGTGAATAGATTT      |                                    |
| human           | IGF2BP3              | GGGAGGTGCTGGATAGTTTAC     | CTAGCTTGGTCCTTACTGGAATAG           |
|                 | YAP1                 | CAGACAGTGGACTAAGCATGAG    | CAGGGTGCTTTGGTTGATAGTA             |
|                 | AFP                  | AAATGCGTTTCTCGTTGC        | TTTCATCCACCACCAAGC                 |
|                 | SOX9                 | CCCCAACAGATCGCCTACAG      | GAGTTCTGGTCGGTGTAGTC               |
|                 | CYCLIN E1            | GTGCAAGCCTCGGATTATT       | GTGCTGATCCCTTAAGTATGTC             |
|                 | CYCLIN B1            | AAGAGCTTTAAACTTTGGTCTGGG  | CTTTGTAAGTCCTTGATTTACCATG          |
|                 | ESRP2                | TGCCACAGAGGATGACTTTG      | ATTGACTGCTGGGCTCTTTG               |
|                 | RPS9                 | GACTCCGGAACAAACGTGAGGT    | CTTCATCTTGCCCTCGTCCA               |
| mouse<br>/human | Let-7a-5p            | TGAGGTAGTAGGTTGTATAGTT    | miScript Universal primer (Qiagen) |
|                 | Let-7c-5p            | TGAGGTAGTAGGTTGTATGGTT    |                                    |
|                 | Let-7e-5p            | TGAGGTAGGAGGTTGTATAGTT    |                                    |
|                 | Let-7f-5p            | TGAGGTAGTAGATTGTATAGTT    |                                    |
|                 | Let-7g-5p            | TGAGGTAGTAGTTTGTACAGTT    |                                    |
|                 | RNU1A                | CGACTGCATAATTTGTGGTAGTGG  |                                    |
